# Supplementary material for: Vero Cells as a Mammalian Cell Substrate for Human Norovirus
Source: MDPI journal article supplement (doi:10.3390/v12040439), 2020-04-14
Supplement: s1 [file s1]

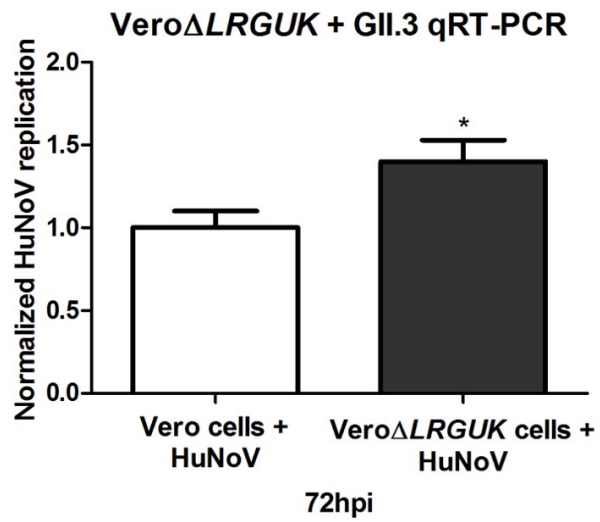

**Figure S6.** *LRGUK* gene KO in Vero cells improves GII.3 HuNoV replication. Knockout of the *LRGUK* gene from Vero cells improved peak virus loads of GII.3 HuNoV in Vero cells at a 72h time-point. Data represent  $n=3 + \text{SEM}$ . \*  $p < 0.05$ .
