# Supplementary material for: Vero Cells as a Mammalian Cell Substrate for Human Norovirus
Source: MDPI journal article supplement (doi:10.3390/v12040439), 2020-04-14
Supplement: s1 [file s1]

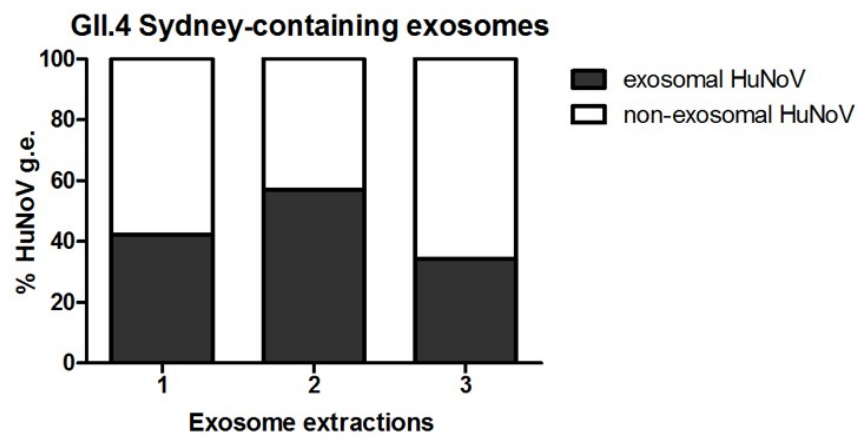

**Figure S3.** Approximately one-half of HuNoV g.e. in stool are associated with exosomes. Exosomal HuNoV g.e. expressed as a percentage of total expected g.e. content from the stool used for exosome extraction.
