# Supplementary material for: Vero Cells as a Mammalian Cell Substrate for Human Norovirus
Source: MDPI journal article supplement (doi:10.3390/v12040439), 2020-04-14
Supplement: s1 [file s1]

| Cell lines              |   | Virus strains        |   | Cell Culture Addition        |   | miRs     |   | Vero KO cell lines |     |
|-------------------------|---|----------------------|---|------------------------------|---|----------|---|--------------------|-----|
| Caco-2 cells            | ✖ | GII.3                | ✓ | Bile                         | – | miR-let7 | – | Δ <i>CNTD2</i>     | –   |
| HEp-2 cells             | ✖ | GII.4 Yerseke 2006a  | ✓ | CD300lf plasmid transfection | – | miR-18a  | – | Δ <i>EMX2</i>      | –   |
| HepG2 cells             | ✖ | GII.4 Den Haag 2006b | ✖ | Higher pH                    | – | miR-26b  | – | Δ <i>EP300</i>     | –   |
| INT-407 cells           | ✖ | GII.4 Sydney 2012    | ✓ | Higher pH + trypsin          | – | miR-105  | – | Δ <i>LRGUK</i>     | ✓/– |
| RAW264.7 cells          | ✖ |                      |   | Lower pH                     | – | miR-223  | – | Δ <i>NEU2</i>      | –   |
| RAW264.7 + Caco-2 cells | ✖ |                      |   | Lower pH + trypsin           | – | miR-512  | – | Δ <i>WDR62</i>     | –   |
| Vero cells              | ✓ |                      |   | Synthetic H-antigen          | – |          |   | Δ <i>ZNF205</i>    | –   |
|                         |   |                      |   | Trypsin                      | ✓ |          |   |                    |     |

**Table S1.** Summary of HuNoV infection efforts. ✓ indicates successful replication or enhancement of infection. – indicates no effect on infection. ✖ indicates no infection. ✓/– for VeroΔ*LRGUK* cells indicates that enhanced replication was observed with GII.3 but not GII.4 Sydney or GII.4 Yerseke strains. Abbreviations: cyclin N-terminal domain containing 2 (*CNTD2*), empty spiracles homeobox 2 (*EMX2*), E1A binding protein p300 (*EP300*), leucine-rich repeats and guanylate kinase domain-containing (*LRGUK*), neuraminidase 2 (*NEU2*), WD repeat domain 62 (*WDR62*), and zinc finger protein 205 (*ZNF205*).
