# Supplementary material for: Vero Cells as a Mammalian Cell Substrate for Human Norovirus
Source: MDPI journal article supplement (doi:10.3390/v12040439), 2020-04-14
Supplement: s1 [file s1]

Lane 1    Lane 2    Lane 3  
1        2        3

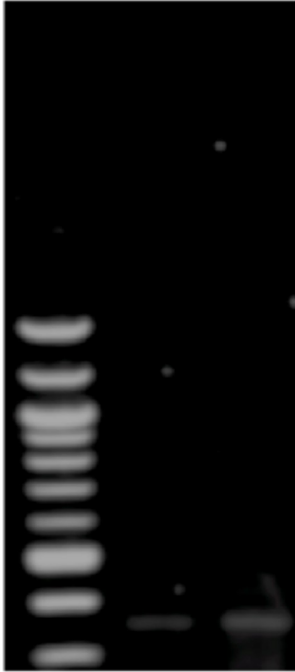

Lane 1: DNA ladder (1500, 1200, 1000, 900, 800, 700, 600, 500, 400, and 300bp markers)

Lane 2: RT-PCR amplified Vero cells + HuNoV 0h time-point RNA

Lane 3: RT-PCR amplified Vero cells + HuNoV 72h time-point RNA

**Figure S1.** ORF1-2 Junction PCR. Amplification of a 350 bp segment, that spans the ORF1-2 junction, is increased at a 72h infection time-point (lane 3) compared to a 0h input time-point (lane 2). 1% agarose gel stained with ethidium bromide and ran at 80V for 2h.
