# Supplementary material for: Vero Cells as a Mammalian Cell Substrate for Human Norovirus
Source: MDPI journal article supplement (doi:10.3390/v12040439), 2020-04-14
Supplement: s1 [file s1]

**A**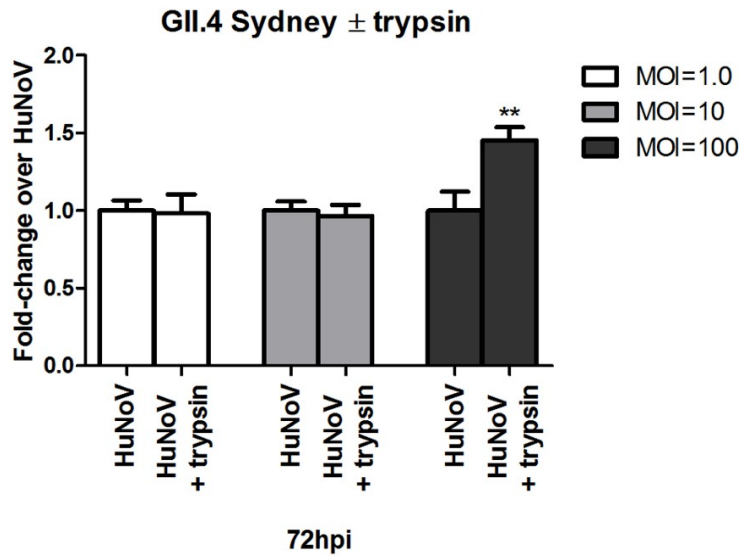**B**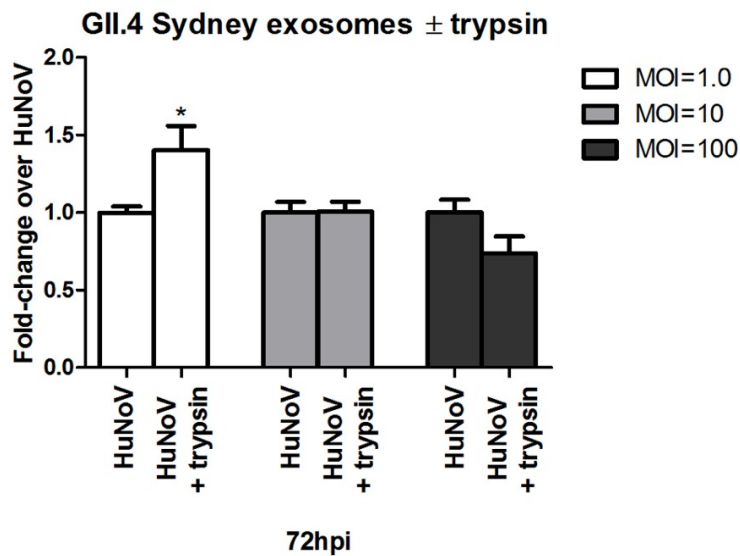

**Figure S5. (A)** Improvement of GII.4 Sydney HuNoV replication by trypsin addition is MOI-dependent. Incubation of 8.8 BAEE units of trypsin with Vero cells increased peak HuNoV levels at a high MOI as measured by qRT-PCR. Data represent  $n=3 + \text{SEM}$ . \*\*  $p < 0.01$ . **(B)** Improvement of exosome-associated GII.4 Sydney HuNoV replication by trypsin addition is MOI-dependent. Incubation of 8.8 BAEE units of trypsin with Vero cells increased peak HuNoV levels at a low MOI as measured by qRT-PCR. Data represent  $n=2 + \text{SEM}$ . \*  $p < 0.05$ .
