# Supplementary material for: Vero Cells as a Mammalian Cell Substrate for Human Norovirus
Source: MDPI journal article supplement (doi:10.3390/v12040439), 2020-04-14
Supplement: s1 [file s1]

| Host gene knockdown |   |                |   |                 |   |               |   |
|---------------------|---|----------------|---|-----------------|---|---------------|---|
| <i>BTN2A1</i>       | – | <i>IL-10R2</i> | – | <i>NAT9</i>     | – | <i>STRADA</i> | – |
| <i>CNTD2</i>        | – | <i>IRF3</i>    | ✓ | <i>NDUFA9</i>   | – | <i>SVOPL</i>  | – |
| <i>COQ9</i>         | – | <i>IRF7</i>    | ✓ | <i>NEU2</i>     | ✓ | <i>TLR2</i>   | ✓ |
| <i>COX20</i>        | – | <i>IRF9</i>    | – | <i>PLA2G1B</i>  | – | <i>TLR3</i>   | ✓ |
| <i>EMX2</i>         | ✓ | <i>JAK1</i>    | – | <i>PYCR1</i>    | ✓ | <i>TLR7</i>   | ✓ |
| <i>EP300</i>        | – | <i>JAK2</i>    | – | <i>RAD51AP1</i> | ✓ | <i>TLR8</i>   | – |
| <i>FGF2</i>         | ✓ | <i>LRGUK</i>   | – | <i>RIG-I</i>    | ✓ | <i>TRAF3</i>  | – |
| <i>GCGR</i>         | – | <i>MAPK6</i>   | – | <i>SEC61G</i>   | ✓ | <i>TYK2</i>   | – |
| <i>IFNGR1</i>       | – | <i>MAVS</i>    | – | <i>STAT1</i>    | – | <i>WDR62</i>  | – |
| <i>IFNGR2</i>       | – | <i>MDA5</i>    | ✓ | <i>STAT2</i>    | – | <i>ZFYVE9</i> | – |

**Table S2.** Summary of antiviral host gene knockdown efforts. ✓ indicates the enhancement of infection. – indicates no effect on infection. Abbreviations: butyrophilin subfamily 2 member A1 (*BTN2A1*), cyclin N-terminal domain containing 2 (*CNTD2*), coenzyme Q9 (*COQ9*), cytochrome c oxidase assembly factor COX20 (*COX20*), empty spiracles homeobox 2 (*EMX2*), E1A binding protein p300 (*EP300*), fibroblast growth factor 2 (*FGF2*), glucagon receptor (*GCGR*), interferon gamma receptor (*IFNGR*), interleukin 10 receptor 2 (*IL-10R2*), interferon regulatory factor (*IRF*), Janus kinase (*JAK*), leucine-rich repeats and guanylate kinase domain-containing (*LRGUK*), mitogen-activated protein kinase 6 (*MAPK6*), mitochondrial antiviral signaling protein (*MAVS*), melanoma differentiation-associated protein 5 (*MDA5*), N-acetyltransferase 9 (*NAT9*), NADH:ubiquinone oxidoreductase subunit A9 (*NDUFA9*), neuraminidase 2 (*NEU2*), phospholipase A2 group IB (*PLA2G1B*), pyrroline-5-carboxylate reductase 1 (*PYCR1*), RAD51 associated protein 1 (*RAD51AP1*), retinoic acid-inducible gene-I (*RIG-I*), Sec61 translocon gamma subunit (*SEC61G*), signal transducer and activator of transcription (*STAT*), STE20 related adaptor alpha (*STRADA*), SVOP like (*SVOPL*), toll-like receptor (*TLR*), TNF receptor associated factor 3 (*TRAF3*), tyrosine kinase 2 (*TYK2*), WD repeat domain 62 (*WDR62*), and zinc finger FYVE-type containing 9 (*ZFYVE9*).
