# Supplementary material for: Vero Cells as a Mammalian Cell Substrate for Human Norovirus
Source: MDPI journal article supplement (doi:10.3390/v12040439), 2020-04-14
Supplement: s1 [file s1]

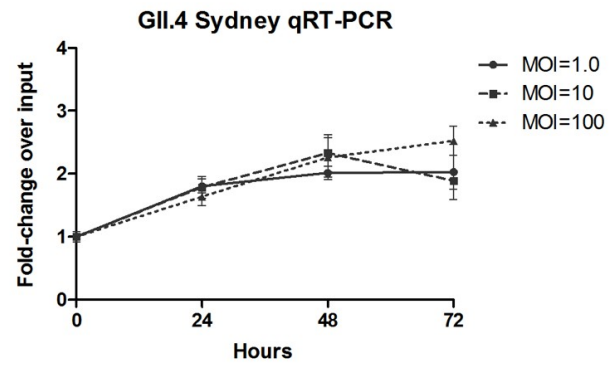

**Figure S4.** Vero cells support GII.4 Sydney HuNoV across a range of MOIs. The temporal course of HuNoV replication is similar regardless of the MOI as quantified by qRT-PCR. Data represent n=3 + SEM.
