# Supplementary figures and images for: Vero Cells as a Mammalian Cell Substrate for Human Norovirus
Source: MDPI journal article supplement (doi:10.3390/v12040439), 2020-04-14

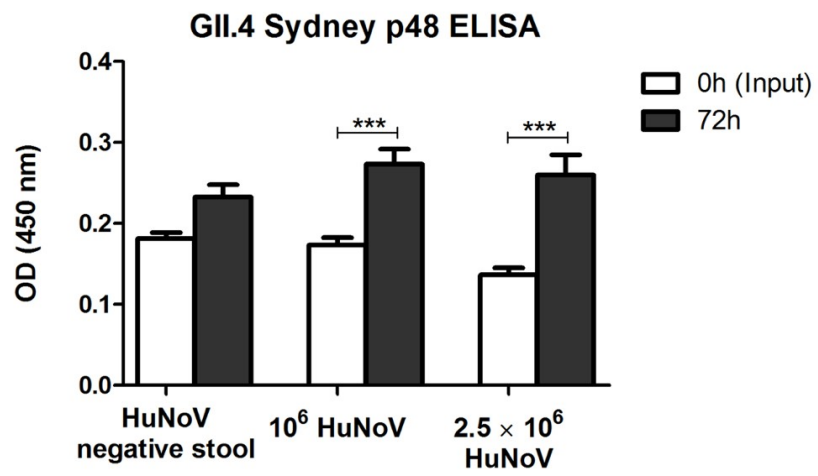

**Figure S2.** Detection of GII.4 Sydney HuNoV p48 by ELISA. Data represent  $n=3 + \text{SEM}$ .  
\*\*\*  $p < 0.001$

Supplement: s1 [file s1]
